# Supplementary material for: The welfare burden of adolescent anxiety and depression: a prospective study of 7500 young Norwegians and their families: the HUNT study
Source: HighWire-hosted journal article supplement (doi:10.1136/bmjopen-2012-001942), 2012-01-01
Supplement: bmjopen-2012-001942supp_table3.pdf [file bmjopen-2012-001942supp_table3.pdf]

Table 3\_appendix: Baseline characteristics (1995 – 1997) of the adolescents and their parents in the study cohort according to the receipt of benefits from age 20-29

|                                                              | No benefits<br>(n=5835) |      | Medical<br>benefits<br>(n=986) |      | Unemployment<br>benefits<br>(n=676) |      |
|--------------------------------------------------------------|-------------------------|------|--------------------------------|------|-------------------------------------|------|
|                                                              | <i>n</i>                | %    | <i>n</i>                       | %    | <i>n</i>                            | %    |
| Adolescent anxiety and depression symptoms                   |                         |      |                                |      |                                     |      |
| SCL-5 score, mean <i>sd</i>                                  | 1.43                    | 0.47 | 1.56                           | 0.56 | 1.45                                | 0.48 |
| High load <sup>a</sup>                                       | 802                     | 14   | 219                            | 22   | 113                                 | 17   |
| Parental anxiety and depression symptoms <sup>ab</sup>       |                         |      |                                |      |                                     |      |
| Mother high load                                             | 1058                    | 20   | 229                            | 26   | 160                                 | 27   |
| Father high load                                             | 844                     | 18   | 147                            | 22   | 100                                 | 20   |
| Adolescent and parental symptom loads combined <sup>ab</sup> |                         |      |                                |      |                                     |      |
| Adolescent low, parents low                                  | 2518                    | 60   | 293                            | 50   | 233                                 | 55   |
| Adolescent low, one parent high                              | 994                     | 24   | 144                            | 25   | 100                                 | 24   |
| Adolescent low, both parents high                            | 157                     | 4    | 34                             | 6    | 20                                  | 5    |
| Adolescent high, parents low                                 | 345                     | 8    | 76                             | 13   | 33                                  | 8    |
| Adolescent high, one parent high                             | 167                     | 4    | 30                             | 5    | 29                                  | 7    |
| Adolescent high, both parents high                           | 41                      | 1    | 10                             | 2    | 10                                  | 2    |
| Girls                                                        | 2853                    | 49   | 605                            | 61   | 310                                 | 46   |
| Age 12-14                                                    | 2034                    | 35   | 306                            | 31   | 184                                 | 27   |
| Age 15-17                                                    | 2812                    | 48   | 533                            | 54   | 342                                 | 51   |
| Age 18-20                                                    | 989                     | 17   | 147                            | 15   | 150                                 | 22   |
| Chronic disease                                              | 1235                    | 21   | 311                            | 32   | 140                                 | 21   |
| Disability                                                   | 331                     | 6    | 122                            | 12   | 37                                  | 5    |
| Sibling in cohort                                            | 2149                    | 37   | 337                            | 34   | 229                                 | 34   |
| Mother tertiary education <sup>b</sup>                       | 1384                    | 24   | 132                            | 14   | 73                                  | 11   |
| Mother secondary education <sup>b</sup>                      | 3640                    | 64   | 623                            | 65   | 433                                 | 67   |
| Mother primary education <sup>b</sup>                        | 698                     | 12   | 198                            | 21   | 142                                 | 22   |
| Father tertiary education <sup>b</sup>                       | 1296                    | 24   | 132                            | 16   | 71                                  | 12   |
| Father secondary education <sup>b</sup>                      | 3382                    | 62   | 524                            | 62   | 411                                 | 68   |
| Father primary education <sup>b</sup>                        | 748                     | 14   | 183                            | 22   | 120                                 | 20   |
| Parents divorced                                             | 866                     | 15   | 264                            | 27   | 161                                 | 24   |
| Single parent                                                | 460                     | 8    | 113                            | 11   | 73                                  | 11   |
| Teenage parents                                              | 326                     | 6    | 113                            | 11   | 66                                  | 10   |
| Adolescent living alone                                      | 310                     | 5    | 73                             | 7    | 54                                  | 8    |

<sup>a</sup> High anxiety and depression symptom loads defined by SCL-5 scale scores of 2.0 or above for adolescents and HADS scores of 8.0 or above (on the anxiety *or* depression subscale) for parents.

<sup>b</sup> Variables with missing data, the number of missing observations indicated in parentheses; mother's anxiety and depression score (653), father's anxiety and depression score (1669), parental anxiety and depression (2263) mother's educational level (174), father's educational level (630).
