# Supplementary material for: The welfare burden of adolescent anxiety and depression: a prospective study of 7500 young Norwegians and their families: the HUNT study
Source: HighWire-hosted journal article supplement (doi:10.1136/bmjopen-2012-001942), 2012-01-01
Supplement: bmjopen-2012-001942supp_table4.pdf [file bmjopen-2012-001942supp_table4.pdf]

Table 4\_appendix Logistic regression analyses associating family exposures to anxiety and depression symptoms in adolescence with receipt of unemployment benefits from age 20 – 29, imputed data

|                                                                                       | Unemployment benefits from age 20-29 |             |                      |             |                      |             |
|---------------------------------------------------------------------------------------|--------------------------------------|-------------|----------------------|-------------|----------------------|-------------|
|                                                                                       | Model 1 <sup>a</sup>                 |             | Model 2 <sup>a</sup> |             | Model 3 <sup>a</sup> |             |
|                                                                                       | OR                                   | (95% CI)    | OR                   | (95% CI)    | OR                   | (95% CI)    |
| <b>According to adolescent and parental anxiety and depression symptoms, n = 7497</b> |                                      |             |                      |             |                      |             |
| Adolescent SCL-5 scale score <sup>bc</sup>                                            | 0.99                                 | (0.84-1.17) | 1.01                 | (0.85-1.21) | 1.00                 | (0.84-1.19) |
| Adolescent low symptom load                                                           | 1.00                                 | (ref)       | 1.00                 | (ref)       | 1.00                 | (ref)       |
| Adolescent high symptom load                                                          | 1.13                                 | (0.91-1.40) | 1.16                 | (0.93-1.44) | 1.14                 | (0.92-1.42) |
| Adolescent low, parents low                                                           | 1.00                                 | (ref)       | 1.00                 | (ref)       | 1.00                 | (ref)       |
| Adolescent low, one parent high                                                       | 1.15                                 | (0.93-1.42) | 1.15                 | (0.94-1.42) | 1.04                 | (0.85-1.29) |
| Adolescent low, both parents high                                                     | 1.43                                 | (0.93-2.18) | 1.44                 | (0.94-2.20) | 1.22                 | (0.79-1.86) |
| Adolescent high, parents low                                                          | 0.99                                 | (0.72-1.34) | 1.01                 | (0.74-1.38) | 1.02                 | (0.74-1.39) |
| Adolescent high, one parent high                                                      | 1.42                                 | (0.97-2.07) | 1.47                 | (1.00-2.16) | 1.31                 | (0.89-1.93) |
| Adolescent high, both parents high                                                    | 1.78                                 | (0.95-3.34) | 1.86                 | (0.99-3.52) | 1.56                 | (0.82-2.94) |
| <b>Comparison of siblings within families, n = 577<sup>c</sup></b>                    |                                      |             |                      |             |                      |             |
| SCL-5 scale score <sup>a</sup>                                                        | 1.11                                 | (0.74-1.66) | 1.22                 | (0.80-1.85) |                      |             |

<sup>a</sup> Model 1: adjusted for age, sex and follow-up time; Model 2: adjusted for age, sex, follow-up time and adolescent somatic health; Model 3: as Model 2, with additional adjustment for parental educational level and family risk factors

<sup>b</sup> Fixed-effect model (conditional logistic regression).

<sup>c</sup> Odds ratios of a one-point increase in the SCL-5 score (range 1-4).
